# Supplementary material
Source: PubMed Central journal article supplement (PMC4833216)
Supplement: mmc1.pdf [file mmc1.pdf]

**Supplemental Data**

**Mutations in *SMG9*, Encoding an Essential Component of  
Nonsense-Mediated Decay Machinery, Cause a Multiple  
Congenital Anomaly Syndrome in Humans and Mice**

**Ranad Shaheen, Shams Anazi, Tawfeg Ben-Omran, Mohammed Zain Seidahmed, L. Brianna Caddle, Kristina Palmer, Rehab Ali, Tarfa Alshidi, Samya Hagos, Leslie Goodwin, Mais Hashem, Salma M. Wakil, Mohamed Abouelhoda, Dilek Colak, Stephen A. Murray, and Fowzan S. Alkuraya**

## 'Supplemental Note: Case Reports'

Family 1: IV:5 (the index) had a birth weight of 2.130 kg (5<sup>th</sup> centile), length of 44 cm (-2.4SD), and head circumference of 31.5 cm (-2.2SD). Antenatal ultrasound scan had revealed polyhydramnios, abnormal umbilical artery Doppler (absent diastolic flow), splaying of the cerebellum and VSD. Apgar scores were 6 and 8 at one and five minutes respectively. Physical examination showed craniofacial abnormalities consisting of prominent forehead and occiput, low set malformed ears, wide anterior fontanelle, depressed nasal bridge and anteverted nares, microphthalmia, high arched palate, clenched hands with camptodactyly. Central nervous system involvement included Dandy-Walker malformation, cerebellar vermis hypoplasia and hypoplastic corpus callosum on CT brain (Figure 1B). Cardiac evaluation revealed interrupted aortic arch, hypoplastic tricuspid and aortic valves, and large muscular VSD. She developed seizures and sepsis, and was mechanically ventilated. Despite aggressive management, she died at the age of 7 weeks. Laboratory investigations included normal hematologic indices, liver functions and renal functions. Her karyotype was 46,XX. Plasma amino acids, carnitine and acylcarnitines were normal. TORCH serology for congenital infections was negative. Renal ultrasound was normal.

Family 2: V:1 (the index) had a birth weight of 2.26 kg, length (-2.2SD) was 47 cm (15<sup>th</sup> centile) and head circumference was 32 cm (-1.8SD). She was found to have right-sided cleft lip, and a large ventricular septal defect (VSD). Additional dysmorphic features included narrow forehead, prominent metopic suture, widow's peak, hypertelorism, posteriorly rotated ears with attached lobules, broad nasal bridge, full and everted lower lip, small eyes, and syndactyly between 2<sup>nd</sup> and 3<sup>rd</sup> toes (Figure 1C and D). She underwent VSD closure at 1 year of age and repair of cleft

lip at 18 months of age. She showed features of global developmental delay. At 3 years of age, she was only able to roll over, but not sit independently. Examination at 14 months of age revealed weight of 6 kg (-4.3SD), length of 67 cm (-3SD) and head circumference of 40 cm (-4.4SD). Neurological examination revealed truncal hypotonia and exaggerated deep tendon reflexes with clonus. Ophthalmological examination was significant for poor vision necessitating corrective glasses. Laboratory investigations showed normal electrolytes, renal and hepatic functions and the hematologic indices. Creatine kinase (CK) was normal. Tandem mass spectrometry (TMS) for metabolic disorders screen was unremarkable. Serum ammonia, lactate, plasma sterol profile and transferrin isoelectric focusing–CDG screening were normal. Array CGH and clinical exome sequencing were negative. Abdominal ultrasound revealed no abnormalities. Her most recent echocardiography showed status post VSD closure, otherwise unremarkable study. Brain MRI performed at 15 months revealed brain atrophy, decreased myelination and Dandy-Walker malformation. IV:3: The first cousin of the index was also found to have a similar phenotype. She was born at term after an uneventful pregnancy and delivery. She was found to have ventricular septal defect (VSD) and dysmorphic features. She underwent VSD closure at 13 months of age. She was also found to have major gastroesophageal reflux and recurrent aspiration necessitating NG feeding, bronchial stenosis and laryngeal cleft type 1. She showed features of global developmental delay. At 2 years of age, there was no eye contact, and she was only able to roll over, but not sit independently. Examination at 2 years of age revealed weight of 6.3 kg (-5.2SD), length of 69 cm (-4.8SD) and head circumference of 39 cm (-6SD). Neurological examination showed truncal hypotonia with peripheral hypertonia, brisk deep tendon reflexes and adductor spasm in both lower limbs. Laboratory investigations showed normal array CGH, plasma sterol profile and lysosomal

studies. Abdominal ultrasound revealed no abnormalities. Her most recent echocardiography showed status post VSD closure, and mild tricuspid regurgitation. Brain MRI performed at 7 months revealed generalized brain atrophy, prominent ventricular system and thin corpus

Figure S1

pLOD

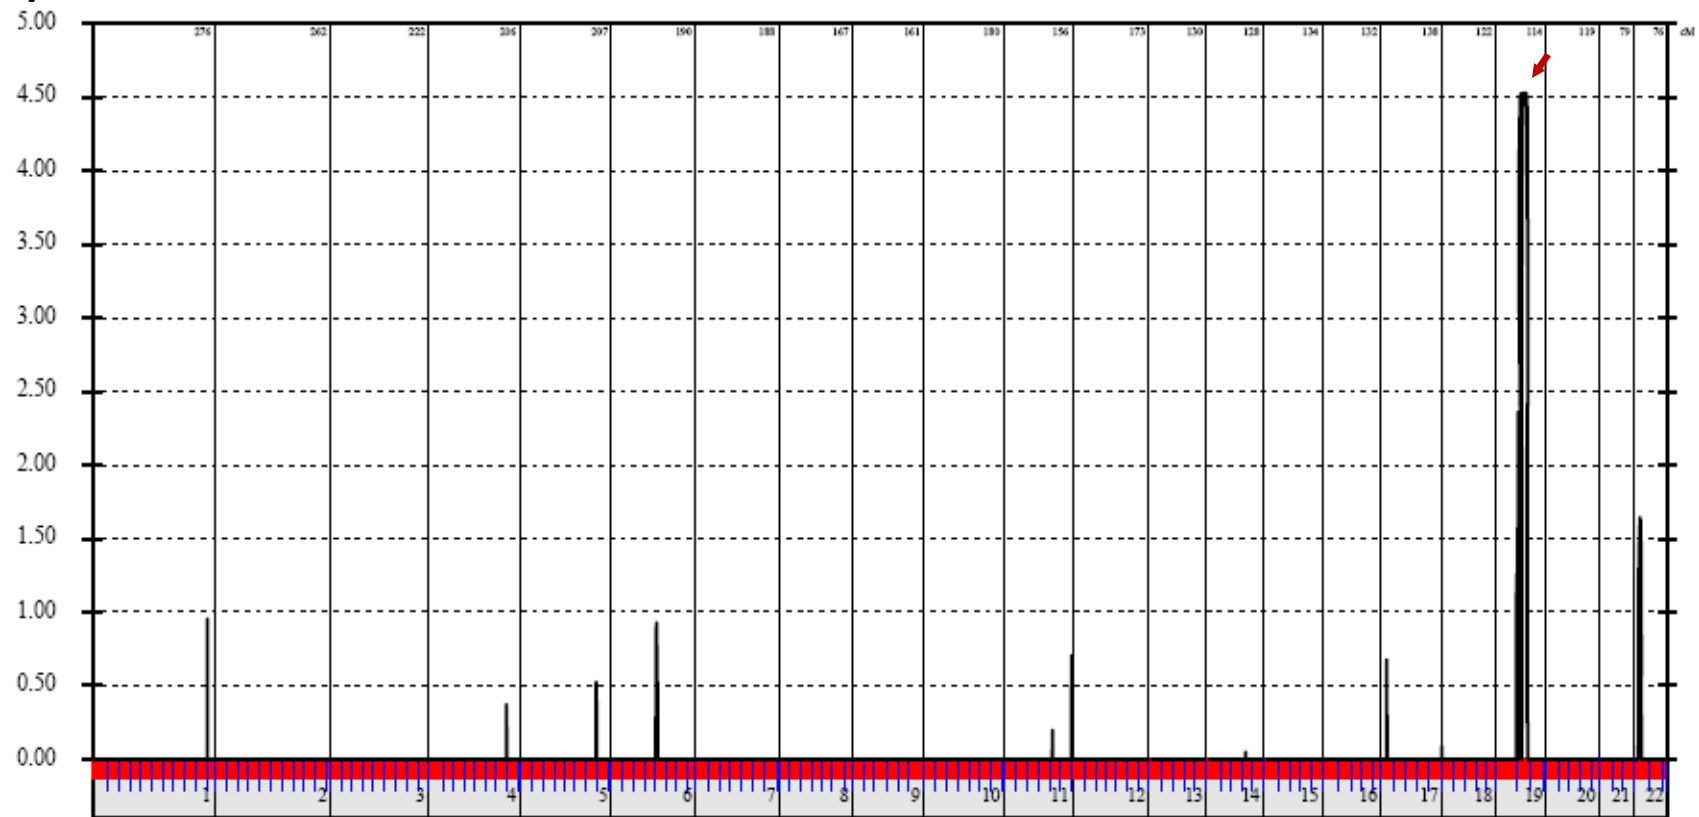

**Figure S1.** Genome-wide linkage analysis revealed a single maximal peak with a LOD score of  $\sim 4.5$  on chromosome 19.

Figure S2

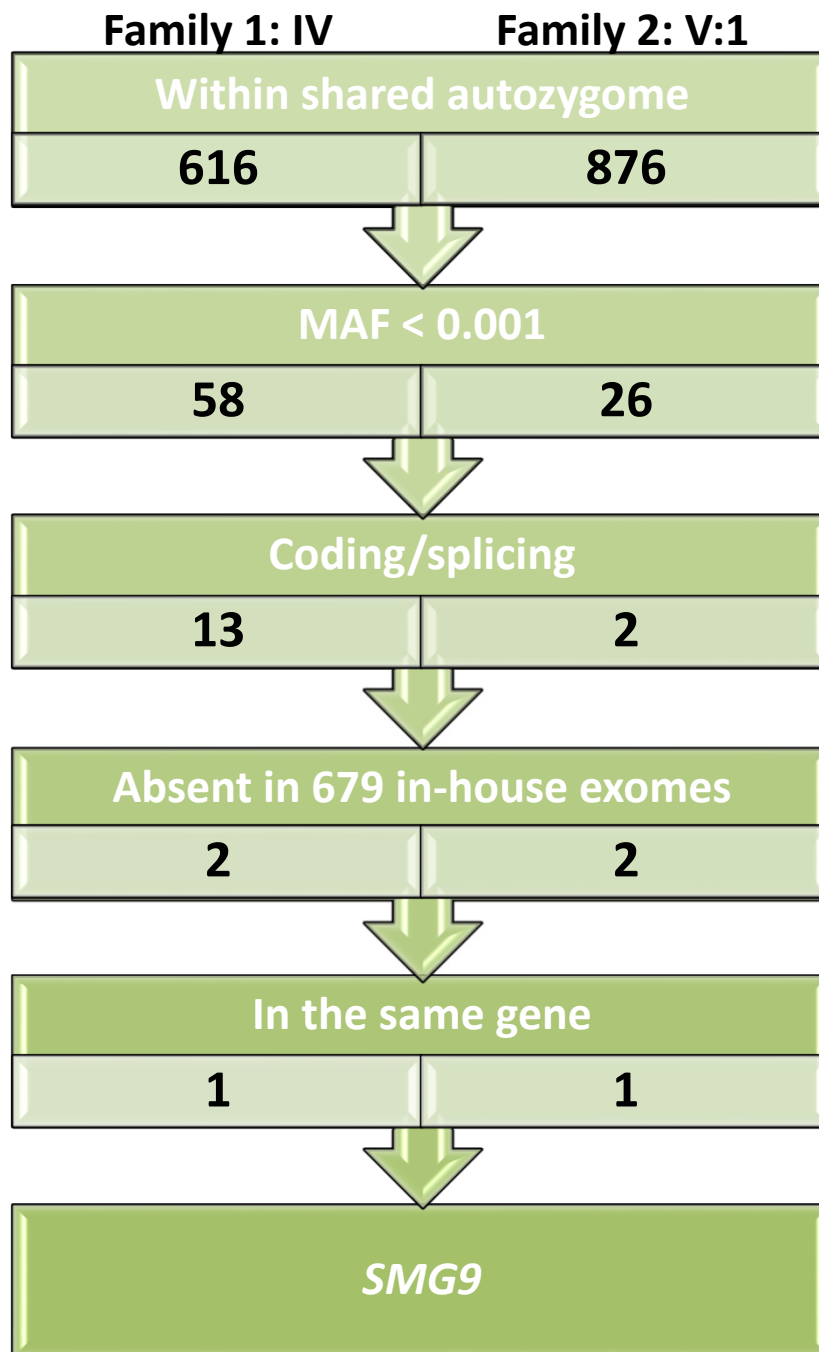

**Figure S2.** Illustration of the exome filtering scheme and the number of survived variants in each step in both families.





**Figure S3.** Immunoblotting using antibody against the N terminal of SMG9 antibody (SAB2107730). The image shows no detectable band from cells derived from affected individual (V:1) as compared with the three normal controls (Ct1, Ct2, Ct3) at the target mass (57.7-54.8) kDa as well as from the truncated transcript (predicted mass approximately 22KDa).

**Figure S4**

**A**

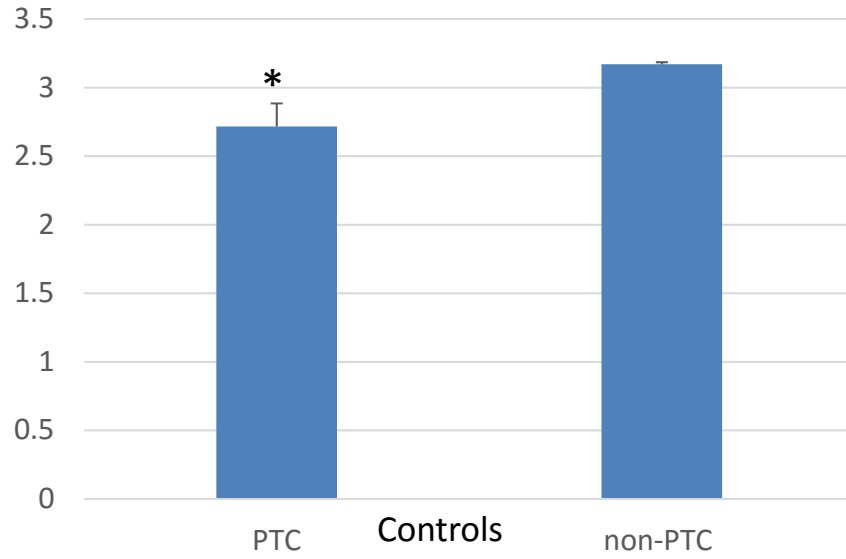

**B**

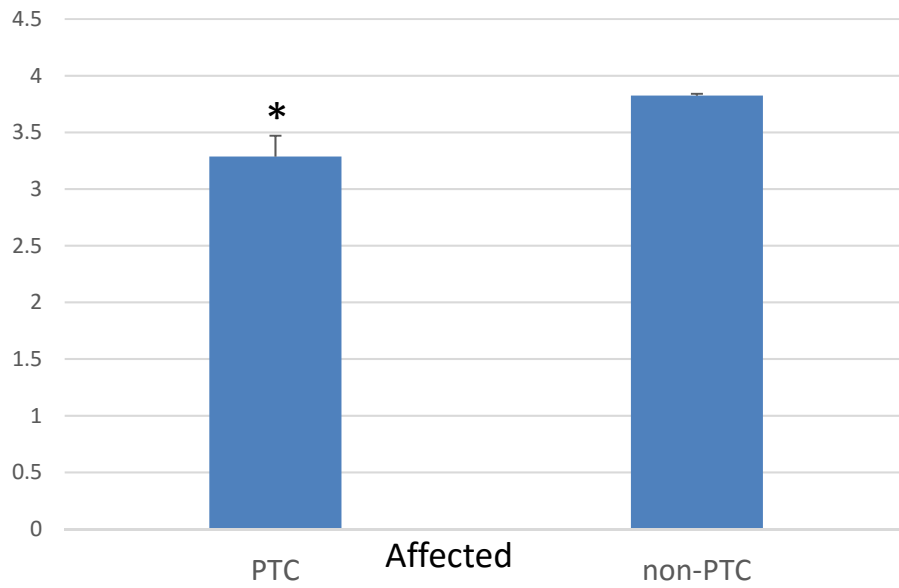

**Figure S4.** Comparison of PTC-containing transcripts to other transcripts in controls and affected individual obtained from the expression microarray. Transcripts with PTC are significantly lower than other transcripts in general in controls (averaged) (A) and affected individual (B) ( $p < 0.01$ ). Data shown represent mean  $\pm$  SEM.

**Figure S5**

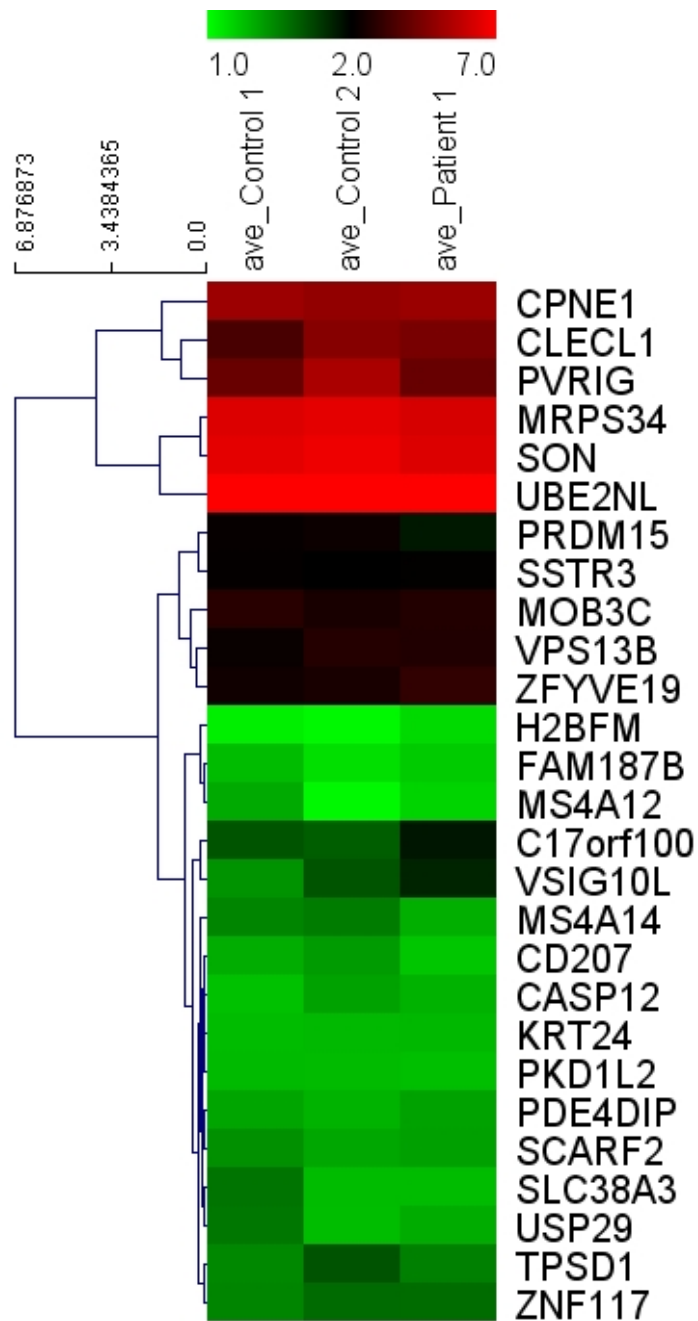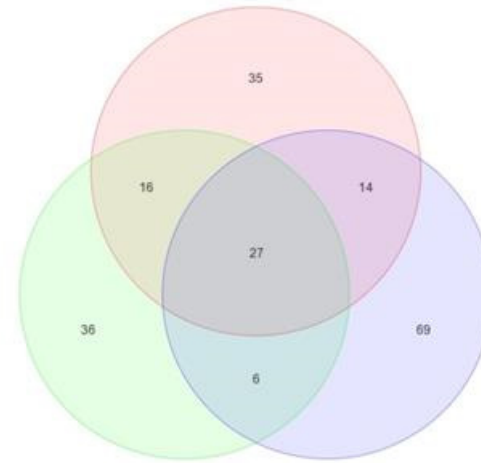

|                     |       |
|---------------------|-------|
| p_value (C1,C2)     | 0.918 |
| p_value (C2,P1)     | 0.827 |
| p_value (P1,C1)     | 0.758 |
| p_value (P1,Cntrls) | 0.986 |

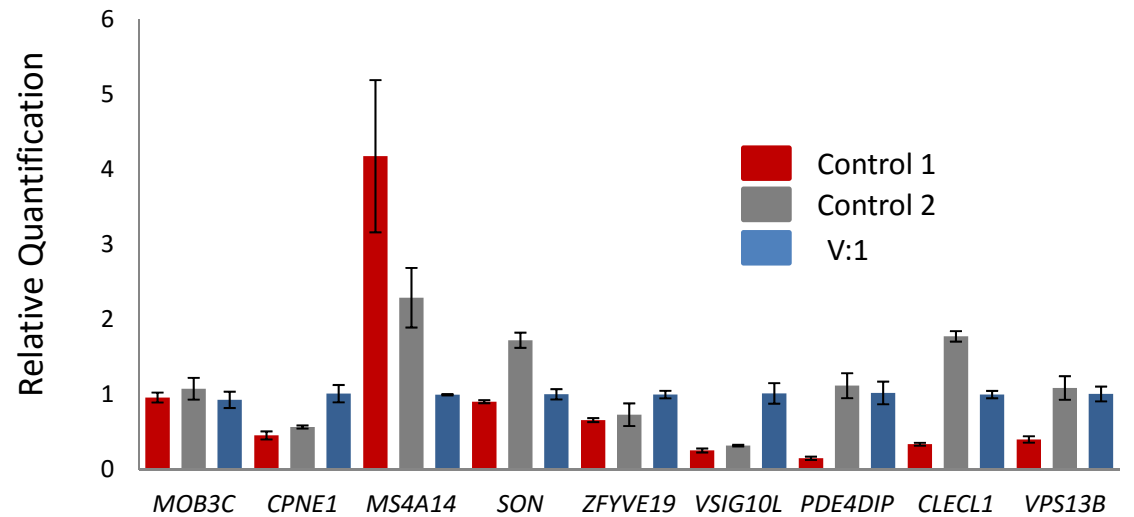

**Figure S5.** Heat-map and Venn diagram of common PTC-containing genes in controls and patient. There was no significant difference between in mRNA expression in affected individual and controls for the 27 shared PTC containing genes (p value  $>0.05$ ). Purple circle in the Venn diagram represents affected individual (V:1), light pink represents control 1 and light green represents control 2.

Figure S6

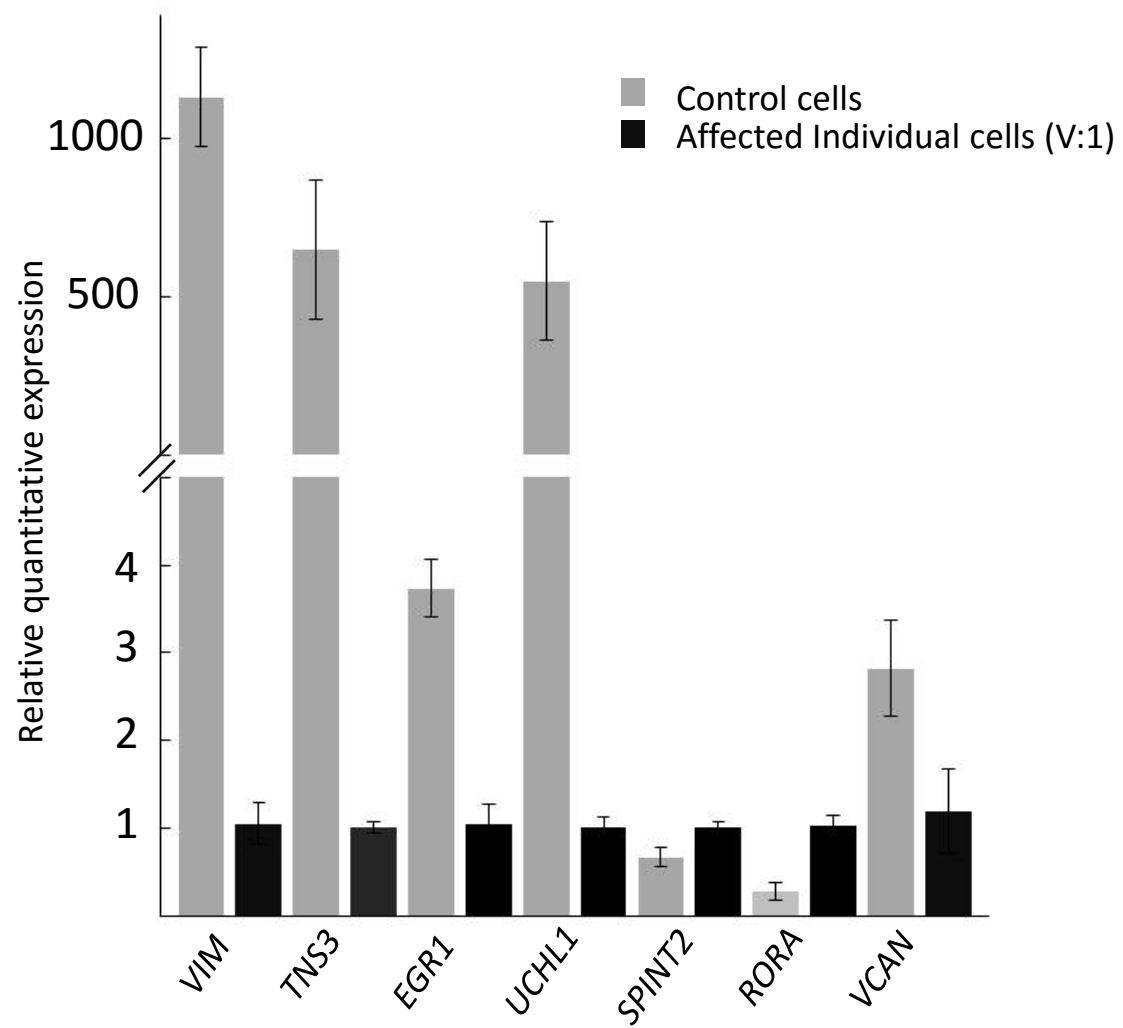

**Figure S6.** Relative quantification Real time PCR result for selected genes found to be dysregulated in the microarray in affected individual (V:1) compared to control. Result is the average of triplicate experiments.



**Figure S7**

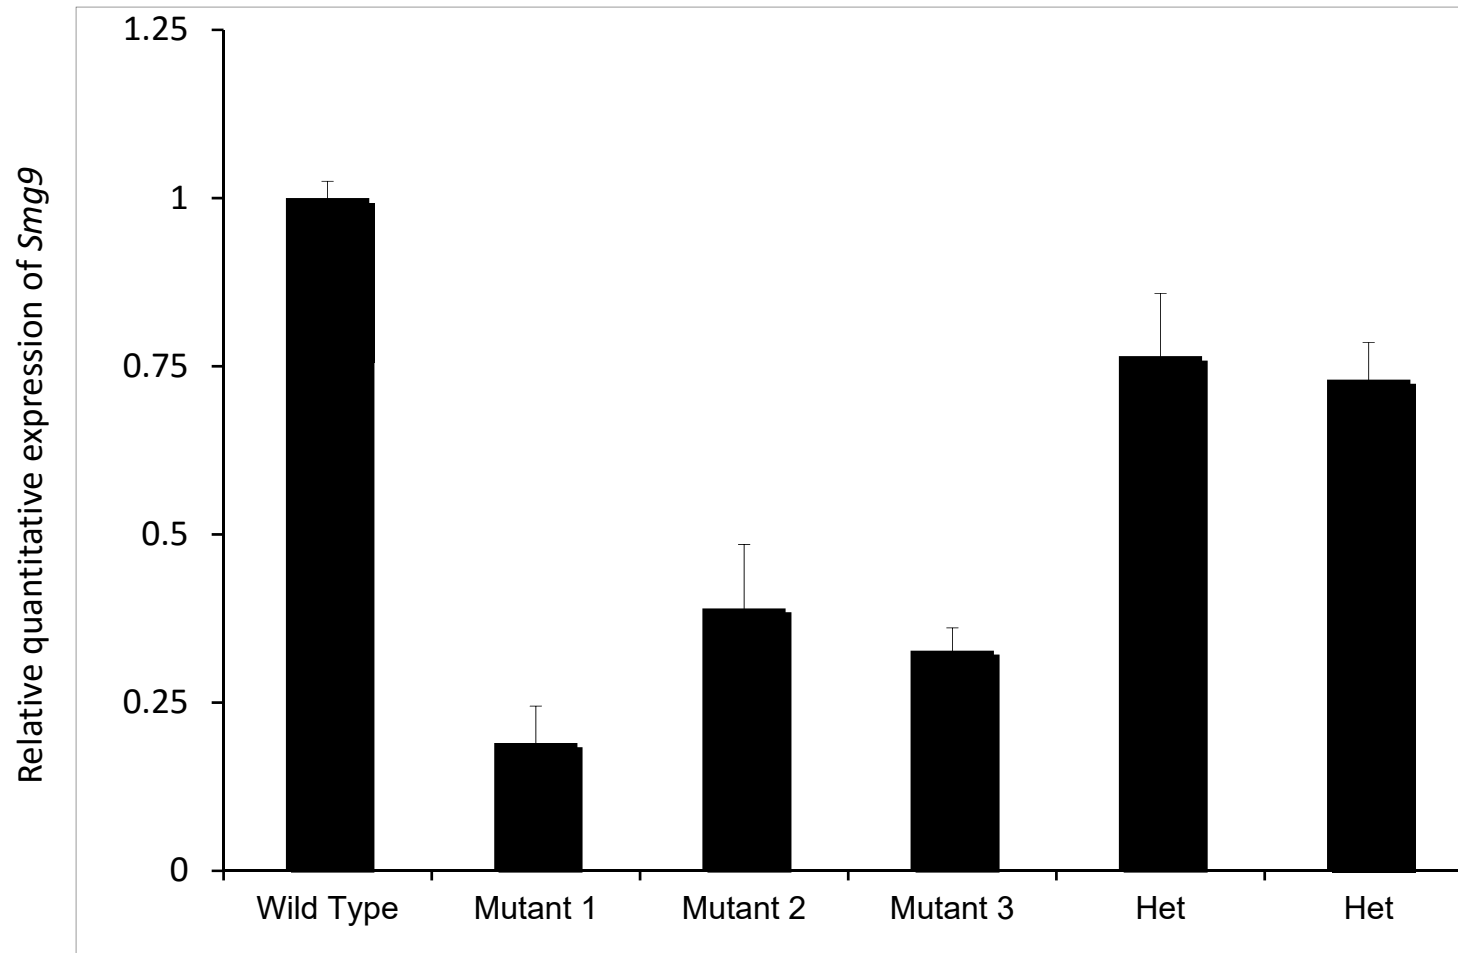

**Figure S7.** Relative quantification Real time PCR of *Smg9* shows 60-80% reduction in *Smg9* transcripts in mutant mouse compare to wild type. Each biological replicate is represented on the bar graphs.

**Supplementary Table 1A.** Significantly up-regulated genes in SMG9 deficient individual compared to controls.

| Gene Symbol                   | Gene Title                                                           | FC <sup>a</sup> |
|-------------------------------|----------------------------------------------------------------------|-----------------|
| <b>CCL20</b>                  | chemokine (C-C motif) ligand 20                                      | 38.3            |
| <b>IGKC</b>                   | immunoglobulin kappa constant                                        | 26.7            |
| <b>DSC2</b>                   | desmocollin 2                                                        | 22.4            |
| <b>CRYBB2 /// CRYBB2P1</b>    | crystallin, beta B2 /// crystallin, beta B2 pseudogene 1             | 20.0            |
| <b>HLA-DRB4</b>               | major histocompatibility complex, class II, DR beta 4                | 19.0            |
| <b>TMPRSS3</b>                | transmembrane protease, serine 3                                     | 16.2            |
| <b>SERPINB2</b>               | serpin peptidase inhibitor, clade B (ovalbumin), member 2            | 15.7            |
| <b>ADAMDEC1</b>               | ADAM-like, decysin 1                                                 | 15.3            |
| <b>RORA</b>                   | RAR-related orphan receptor A                                        | 14.3            |
| <b>CXCL9</b>                  | chemokine (C-X-C motif) ligand 9                                     | 14.3            |
| <b>CRNDE</b>                  | colorectal neoplasia differentially expressed (non-protein coding)   | 13.2            |
| <b>CASP1</b>                  | caspase 1, apoptosis-related cysteine peptidase                      | 12.3            |
| <b>DSC3</b>                   | desmocollin 3                                                        | 11.3            |
| <b>TACSTD2</b>                | tumor-associated calcium signal transducer 2                         | 10.2            |
| <b>PRRX1</b>                  | paired related homeobox 1                                            | 8.9             |
| <b>CMTM7</b>                  | CKLF-like MARVEL transmembrane domain containing 7                   | 8.5             |
| <b>TAGAP</b>                  | T-cell activation RhoGTPase activating protein                       | 6.8             |
| <b>LOC100506548 /// RPL37</b> | uncharacterized LOC100506548 /// ribosomal protein L37               | 6.8             |
| <b>VCAN</b>                   | versican                                                             | 6.7             |
| <b>TCFL5</b>                  | transcription factor-like 5 (basic helix-loop-helix)                 | 6.7             |
| <b>PHF16</b>                  | PHD finger protein 16                                                | 6.6             |
| <b>GLUL</b>                   | glutamate-ammonia ligase                                             | 6.5             |
| <b>CMAHP</b>                  | cytidine monophospho-N-acetylneuraminic acid hydroxylase, pseudogene | 6.3             |

|                                                  |                                                                                            |     |
|--------------------------------------------------|--------------------------------------------------------------------------------------------|-----|
| <b>SPINT2</b>                                    | serine peptidase inhibitor, Kunitz type, 2                                                 | 6.0 |
| <b>PIEZO2</b>                                    | piezo-type mechanosensitive ion channel component 2                                        | 6.0 |
| <b>CARD16 /// CASP1</b>                          | caspase recruitment domain family, member 16 ///<br>caspase 1, apoptosis-related cysteine  | 5.8 |
| <b>NOTCH2</b>                                    | notch 2                                                                                    | 5.8 |
| <b>HSPA6</b>                                     | heat shock 70kDa protein 6 (HSP70B <sup>1</sup> )                                          | 5.8 |
| <b>UXS1</b>                                      | UDP-glucuronate decarboxylase 1                                                            | 5.6 |
| <b>C12orf79</b>                                  | chromosome 12 open reading frame 79                                                        | 5.5 |
| <b>UGT8</b>                                      | UDP glycosyltransferase 8                                                                  | 5.4 |
| <b>LOC101060315 //NOTCH2<br/>/// NOTCH2NL</b>    | neurogenic locus notch homolog protein 2-like ///<br>neurogenic locus notch homolog protei | 5.4 |
| <b>LOC389906</b>                                 | zinc finger protein 839 pseudogene                                                         | 5.4 |
| <b>KRT7</b>                                      | keratin 7                                                                                  | 5.2 |
| <b>SETD7</b>                                     | SET domain containing (lysine methyltransferase) 7                                         | 5.2 |
| <b>SOCS2</b>                                     | suppressor of cytokine signaling 2                                                         | 5.1 |
| <b>CARD16</b>                                    | caspase recruitment domain family, member 16                                               | 5.0 |
| <b>APLP2</b>                                     | amyloid beta (A4) precursor-like protein 2                                                 | 4.8 |
| <b>CR2</b>                                       | complement component (3d/Epstein Barr virus)<br>receptor 2                                 | 4.7 |
| <b>OTTHUMG00000168533 ///<br/>RP11-277P12.20</b> | NULL /// NULL                                                                              | 4.6 |
| <b>LINC00888</b>                                 | long intergenic non-protein coding RNA 888                                                 | 4.4 |
| <b>NIPAL4</b>                                    | NIPA-like domain containing 4                                                              | 4.3 |
| <b>LOC100506453</b>                              | uncharacterized LOC100506453 /// zinc finger protein<br>839 pseudogene /// uncharacterized | 4.3 |
| <b>NUDT12</b>                                    | nudix (nucleoside diphosphate linked moiety X)-type<br>motif 12                            | 4.3 |
| <b>ITM2A</b>                                     | integral membrane protein 2A                                                               | 4.2 |
| <b>BAG3</b>                                      | BCL2-associated athanogene 3                                                               | 4.2 |
| <b>JAK1</b>                                      | Janus kinase 1                                                                             | 4.2 |
| <b>CBS</b>                                       | cystathionine-beta-synthase                                                                | 4.2 |

|                                     |                                                                                         |     |
|-------------------------------------|-----------------------------------------------------------------------------------------|-----|
| <b>TBC1D1</b>                       | TBC1 (tre-2/USP6, BUB2, cdc16) domain family, member 1                                  | 4.1 |
| <b>ZAK</b>                          | sterile alpha motif and leucine zipper containing kinase<br>AZK                         | 4.0 |
| <b>PGAP1</b>                        | post-GPI attachment to proteins 1                                                       | 4.0 |
| <b>LOC100996457</b>                 | uncharacterized LOC100996457                                                            | 4.0 |
| <b>RASA4 /// RASA4B /// RASA4CP</b> | RAS p21 protein activator 4 /// RAS p21 protein activator 4B /// RAS p21 protein activa | 3.9 |
| <b>JUN</b>                          | jun proto-oncogene                                                                      | 3.9 |
| <b>FOXO3</b>                        | forkhead box O3                                                                         | 3.8 |
| <b>KLF3</b>                         | Kruppel-like factor 3 (basic)                                                           | 3.8 |
| <b>ANKDD1A</b>                      | ankyrin repeat and death domain containing 1A                                           | 3.8 |
| <b>DHRS7</b>                        | dehydrogenase/reductase (SDR family) member 7                                           | 3.7 |
| <b>IFRD1</b>                        | interferon-related developmental regulator 1                                            | 3.7 |
| <b>CD44</b>                         | CD44 molecule (Indian blood group)                                                      | 3.7 |
| <b>SPIN3</b>                        | spindlin family, member 3                                                               | 3.6 |
| <b>DNAJC18</b>                      | DnaJ (Hsp40) homolog, subfamily C, member 18                                            | 3.6 |
| <b>IL1R2</b>                        | interleukin 1 receptor, type II                                                         | 3.5 |
| <b>CR1</b>                          | complement component (3b/4b) receptor 1 (Knops blood group)                             | 3.5 |
| <b>KCNN2</b>                        | potassium intermediate/small conductance calcium-activated channel, subfamily N, member | 3.4 |
| <b>PSPC1</b>                        | paraspeckle component 1                                                                 | 3.4 |
| <b>ERAP2</b>                        | endoplasmic reticulum aminopeptidase 2                                                  | 3.4 |
| <b>BAG1</b>                         | BCL2-associated athanogene                                                              | 3.3 |
| <b>GOLM1</b>                        | golgi membrane protein 1                                                                | 3.3 |
| ---                                 | ---                                                                                     | 3.2 |
| <b>TSC22D1</b>                      | TSC22 domain family, member 1                                                           | 3.2 |
| <b>GLB1L3</b>                       | galactosidase, beta 1-like 3                                                            | 3.2 |
| <b>CD55</b>                         | CD55 molecule, decay accelerating factor for complement (Cromer blood group)            | 3.2 |

|                                                              |                                                                                         |     |
|--------------------------------------------------------------|-----------------------------------------------------------------------------------------|-----|
| <b>TMEM173</b>                                               | transmembrane protein 173                                                               | 3.2 |
| <b>NFKBIZ</b>                                                | nuclear factor of kappa light polypeptide gene enhancer in B-cells inhibitor, zeta      | 3.1 |
| <b>AZI2</b>                                                  | 5-azacytidine induced 2                                                                 | 3.1 |
| <b>LOC100507581</b>                                          | uncharacterized LOC100507581                                                            | 3.1 |
| <b>FNDC3B</b>                                                | fibronectin type III domain containing 3B                                               | 3.1 |
| <b>GAS5 /// SNORD44 ///</b>                                  | growth arrest-specific 5 (non-protein coding) /// small nucleolar RNA, C/D box 44 /// s | 3.1 |
| <b>SNHG12 /// SNORA16A ///</b><br><b>SNORA44 /// SNORA61</b> | small nucleolar RNA host gene 12 (non-protein coding) /// small nucleolar RNA, H/ACA bo | 3.0 |
| <b>TET2</b>                                                  | tet methylcytosine dioxygenase 2                                                        | 3.0 |
| <b>GADD45B</b>                                               | growth arrest and DNA-damage-inducible, beta                                            | 3.0 |
| <b>MAN1A1</b>                                                | mannosidase, alpha, class 1A, member 1                                                  | 3.0 |
| <b>CXCR4</b>                                                 | chemokine (C-X-C motif) receptor 4                                                      | 3.0 |
| <b>EPB41L4A-AS1</b>                                          | EPB41L4A antisense RNA 1                                                                | 3.0 |
| <b>RASA4 /// RASA4B</b>                                      | RAS p21 protein activator 4 /// RAS p21 protein activator 4B                            | 3.0 |
| <b>ZBTB10</b>                                                | zinc finger and BTB domain containing 10                                                | 3.0 |
| <b>MAP3K7CL</b>                                              | MAP3K7 C-terminal like                                                                  | 2.9 |
| <b>PLAU</b>                                                  | plasminogen activator, urokinase                                                        | 2.9 |
| <b>SNHG15 /// SNORA9</b>                                     | small nucleolar RNA host gene 15 (non-protein coding) /// small nucleolar RNA, H/ACA bo | 2.9 |
| <b>C17orf58</b>                                              | chromosome 17 open reading frame 58                                                     | 2.9 |
| <b>C6orf48</b>                                               | chromosome 6 open reading frame 48                                                      | 2.9 |
| <b>GPR55</b>                                                 | G protein-coupled receptor 55                                                           | 2.9 |
| <b>IL2RA</b>                                                 | interleukin 2 receptor, alpha                                                           | 2.9 |
| <b>CBLB</b>                                                  | Cbl proto-oncogene, E3 ubiquitin protein ligase B                                       | 2.8 |
| <b>BZW2</b>                                                  | basic leucine zipper and W2 domains 2                                                   | 2.8 |
| <b>LOC152225</b>                                             | uncharacterized LOC152225                                                               | 2.8 |
| <b>TFDP2</b>                                                 | transcription factor Dp-2 (E2F dimerization partner 2)                                  | 2.8 |

|                                                      |                                                                                          |     |
|------------------------------------------------------|------------------------------------------------------------------------------------------|-----|
| <b>TP53BP2</b>                                       | tumor protein p53 binding protein, 2                                                     | 2.8 |
| <b>THAP9-AS1</b>                                     | THAP9 antisense RNA 1                                                                    | 2.8 |
| <b>FAM189A1</b>                                      | family with sequence similarity 189, member A1                                           | 2.8 |
| <b>CCR7</b>                                          | chemokine (C-C motif) receptor 7                                                         | 2.7 |
| <b>RAB27A</b>                                        | RAB27A, member RAS oncogene family                                                       | 2.7 |
| <b>ZFAS1</b>                                         | ZNFX1 antisense RNA 1                                                                    | 2.7 |
| <b>EXOSC7</b>                                        | exosome component 7                                                                      | 2.7 |
| <b>UPF3B</b>                                         | UPF3 regulator of nonsense transcripts homolog B (yeast)                                 | 2.7 |
| <b>SNHG6 /// SNORD87</b>                             | small nucleolar RNA host gene 6 (non-protein coding) /// small nucleolar RNA, C/D box 8  | 2.6 |
| <b>HNRNPA2B1</b>                                     | heterogeneous nuclear ribonucleoprotein A2/B1                                            | 2.6 |
| <b>ARSK</b>                                          | arylsulfatase family, member K                                                           | 2.6 |
| <b>RGPD3 /// RGPD4 /// RGPD5 /// RGPD6 /// RGPD8</b> | RANBP2-like and GRIP domain containing 3 /// RANBP2-like and GRIP domain containing 4 /  | 2.6 |
| <b>GADD45A</b>                                       | growth arrest and DNA-damage-inducible, alpha                                            | 2.6 |
| <b>BMP4</b>                                          | bone morphogenetic protein 4                                                             | 2.6 |
| <b>POLR2J2 /// POLR2J3 /// POLR2J4 /// UPK3BL</b>    | polymerase (RNA) II (DNA directed) polypeptide J2 /// polymerase (RNA) II (DNA directed) | 2.6 |
| <b>GAB1</b>                                          | GRB2-associated binding protein 1                                                        | 2.5 |
| <b>DOCK9</b>                                         | dedicator of cytokinesis 9                                                               | 2.5 |
| <b>ERCC8</b>                                         | excision repair cross-complementing rodent repair deficiency, complementation group 8    | 2.5 |
| <b>DNAJB2</b>                                        | DnaJ (Hsp40) homolog, subfamily B, member 2                                              | 2.5 |
| <b>SARNP</b>                                         | SAP domain containing ribonucleoprotein                                                  | 2.5 |
| <b>HNRNPA1</b>                                       | heterogeneous nuclear ribonucleoprotein A1                                               | 2.5 |
| <b>CD274</b>                                         | CD274 molecule                                                                           | 2.5 |
| <b>CD86</b>                                          | CD86 molecule                                                                            | 2.5 |
| <b>PIK3R5</b>                                        | phosphoinositide-3-kinase, regulatory subunit 5                                          | 2.5 |
| <b>DENND1A</b>                                       | DENN/MADD domain containing 1A                                                           | 2.5 |

|                         |                                                                                         |     |
|-------------------------|-----------------------------------------------------------------------------------------|-----|
| <b>CCL5</b>             | chemokine (C-C motif) ligand 5                                                          | 2.5 |
| <b>CLYBL</b>            | citrate lyase beta like                                                                 | 2.5 |
| <b>CFP</b>              | complement factor properdin                                                             | 2.4 |
| <b>TIGIT</b>            | T cell immunoreceptor with Ig and ITIM domains                                          | 2.4 |
| <b>GALNT1</b>           | UDP-N-acetyl-alpha-D-galactosamine:polypeptide N-acetylgalactosaminyltransferase 1 (Gal | 2.4 |
| <b>UFM1</b>             | ubiquitin-fold modifier 1                                                               | 2.3 |
| <b>LOC728613</b>        | programmed cell death 6 pseudogene                                                      | 2.3 |
| <b>F11R</b>             | F11 receptor                                                                            | 2.3 |
| <b>MBNL3</b>            | muscleblind-like splicing regulator 3                                                   | 2.3 |
| <b>RBMX /// SNORD61</b> | RNA binding motif protein, X-linked /// small nucleolar RNA, C/D box 61                 | 2.3 |
| <b>OARD1</b>            | O-acyl-ADP-ribose deacylase 1                                                           | 2.3 |
| <b>RASSF1</b>           | Ras association (RalGDS/AF-6) domain family member 1                                    | 2.3 |
| <b>MDM2</b>             | MDM2 oncogene, E3 ubiquitin protein ligase                                              | 2.3 |
| <b>GPATCH2L</b>         | G patch domain containing 2-like                                                        | 2.3 |
| <b>LOC100506453</b>     | uncharacterized LOC100506453 /// zinc finger protein 839 pseudogene /// uncharacterized | 2.3 |
| <b>IL6</b>              | interleukin 6 (interferon, beta 2)                                                      | 2.2 |
| <b>MICU3</b>            | mitochondrial calcium uptake family, member 3                                           | 2.2 |
| <b>PTBP2</b>            | polypyrimidine tract binding protein 2                                                  | 2.2 |
| <b>RC3H1</b>            | ring finger and CCCH-type domains 1                                                     | 2.2 |
| <b>ATP2B4</b>           | ATPase, Ca <sup>++</sup> transporting, plasma membrane 4                                | 2.2 |
| <b>COA1</b>             | cytochrome c oxidase assembly factor 1 homolog (S. cerevisiae)                          | 2.2 |
| <b>C5orf56</b>          | chromosome 5 open reading frame 56                                                      | 2.2 |
| <b>LETMD1</b>           | LETM1 domain containing 1                                                               | 2.2 |
| <b>LRRC37B</b>          | leucine rich repeat containing 37B                                                      | 2.2 |
| <b>ZNF79</b>            | zinc finger protein 79                                                                  | 2.2 |
| <b>TESPA1</b>           | thymocyte expressed, positive selection associated 1                                    | 2.2 |



|                              |                                                                                            |     |
|------------------------------|--------------------------------------------------------------------------------------------|-----|
| <b>TTC38</b>                 | tetratricopeptide repeat domain 38                                                         | 2.2 |
| <b>UHRF1BP1L</b>             | UHRF1 binding protein 1-like                                                               | 2.2 |
| <b>LOC100996400 /// NOL4</b> | uncharacterized LOC100996400 /// nucleolar protein 4                                       | 2.2 |
| <b>HSDL2</b>                 | hydroxysteroid dehydrogenase like 2                                                        | 2.2 |
| <b>RABEP1</b>                | rabaptin, RAB GTPase binding effector protein 1                                            | 2.2 |
| <b>VDR</b>                   | vitamin D (1,25- dihydroxyvitamin D3) receptor                                             | 2.1 |
| <b>TTF2</b>                  | transcription termination factor, RNA polymerase II                                        | 2.1 |
| <b>PRMT2</b>                 | protein arginine methyltransferase 2                                                       | 2.1 |
| <b>SNHG8 /// SNORA24</b>     | small nucleolar RNA host gene 8 (non-protein coding)<br>/// small nucleolar RNA, H/ACA box | 2.1 |
| <b>ISG20</b>                 | interferon stimulated exonuclease gene 20kDa                                               | 2.1 |
| <b>LARP1B</b>                | La ribonucleoprotein domain family, member 1B                                              | 2.1 |
| <b>CRYBB2P1</b>              | crystallin, beta B2 pseudogene 1                                                           | 2.1 |
| <b>RFX3</b>                  | regulatory factor X, 3 (influences HLA class II expression)                                | 2.1 |
| <b>FAM188A</b>               | family with sequence similarity 188, member A                                              | 2.1 |
| <b>LOC645513</b>             | uncharacterized LOC645513                                                                  | 2.1 |
| <b>NBN</b>                   | nibrin                                                                                     | 2.0 |
| <b>C7orf31</b>               | chromosome 7 open reading frame 31                                                         | 2.0 |
| <b>MIR155 /// MIR155HG</b>   | microRNA 155 /// MIR155 host gene (non-protein coding)                                     | 2.0 |
| <b>ARNTL2</b>                | aryl hydrocarbon receptor nuclear translocator-like 2                                      | 2.0 |
| <b>SNHG1 /// SNORD22</b>     | small nucleolar RNA host gene 1 (non-protein coding)<br>/// small nucleolar RNA, C/D box 2 | 2.0 |
| <b>IL10RB</b>                | interleukin 10 receptor, beta                                                              | 2.0 |
| <b>BTG3</b>                  | BTG family, member 3                                                                       | 2.0 |

<sup>a</sup>FC was calculated between the mean values of control and patient

**Supplementary Table 1B.** Significantly down-regulated genes in SMG9 deficient individual compared to controls.

| Gene Symbol                                  | Gene Title                                                                              | FC <sup>a</sup> |
|----------------------------------------------|-----------------------------------------------------------------------------------------|-----------------|
| <b>HLA-DQA1</b>                              | major histocompatibility complex, class II, DQ alpha 1                                  | -39.2           |
| <b>IGHG1 /// IGHG2 /// IGHM /// IGHV4-31</b> | immunoglobulin heavy constant gamma 1 (G1m marker) /// immunoglobulin heavy constant ga | -20.3           |
| <b>VIM</b>                                   | vimentin                                                                                | -15.5           |
| <b>UCHL1</b>                                 | ubiquitin carboxyl-terminal esterase L1 (ubiquitin thiolesterase)                       | -10.0           |
| <b>SLC12A8</b>                               | solute carrier family 12 (potassium/chloride transporters), member 8                    | -7.8            |
| <b>DUSP4</b>                                 | dual specificity phosphatase 4                                                          | -6.1            |
| <b>MB21D2</b>                                | Mab-21 domain containing 2                                                              | -5.6            |
| <b>CECR1</b>                                 | cat eye syndrome chromosome region, candidate 1                                         | -5.1            |
| <b>COL5A1</b>                                | collagen, type V, alpha 1                                                               | -4.8            |
| <b>LCK</b>                                   | lymphocyte-specific protein tyrosine kinase                                             | -4.8            |
| <b>BIN1</b>                                  | bridging integrator 1                                                                   | -4.7            |
| <b>ARL4C</b>                                 | ADP-ribosylation factor-like 4C                                                         | -4.6            |
| <b>CRIM1</b>                                 | cysteine rich transmembrane BMP regulator 1 (chordin-like)                              | -4.5            |
| <b>PLD6</b>                                  | phospholipase D family, member 6                                                        | -4.5            |
| <b>TNS3</b>                                  | tensin 3                                                                                | -4.5            |
| <b>TSPO</b>                                  | translocator protein (18kDa)                                                            | -4.2            |
| <b>KDM4C</b>                                 | lysine (K)-specific demethylase 4C                                                      | -4.1            |
| <b>WARS2</b>                                 | tryptophanyl tRNA synthetase 2, mitochondrial                                           | -3.5            |
| <b>CAPG</b>                                  | capping protein (actin filament), gelsolin-like                                         | -3.3            |
| <b>SLC8A3</b>                                | solute carrier family 8 (sodium/calcium exchanger), member 3                            | -3.1            |
| <b>NFIL3</b>                                 | nuclear factor, interleukin 3 regulated                                                 | -3.1            |

|                                                |                                                                                         |      |
|------------------------------------------------|-----------------------------------------------------------------------------------------|------|
| <b>LILRB4</b>                                  | leukocyte immunoglobulin-like receptor, subfamily B (with TM and ITIM domains), member  | -3.1 |
| <b>RNASET2</b>                                 | ribonuclease T2                                                                         | -3.0 |
| <b>RHOB</b>                                    | ras homolog family member B                                                             | -3.0 |
| <b>ALOX5</b>                                   | arachidonate 5-lipoxygenase                                                             | -3.0 |
| <b>S100A11</b>                                 | S100 calcium binding protein A11                                                        | -3.0 |
| <b>EGR1</b>                                    | early growth response 1                                                                 | -2.8 |
| <b>PMEPA1</b>                                  | prostate transmembrane protein, androgen induced 1                                      | -2.7 |
| <b>TNFRSF1B</b>                                | tumor necrosis factor receptor superfamily, member 1B                                   | -2.6 |
| <b>TMC8</b>                                    | transmembrane channel-like 8                                                            | -2.6 |
| <b>TCF4</b>                                    | transcription factor 4                                                                  | -2.5 |
| <b>KIAA1551</b>                                | KIAA1551                                                                                | -2.5 |
| <b>LOC285972</b>                               | uncharacterized LOC285972                                                               | -2.4 |
| <b>PPAT</b>                                    | phosphoribosyl pyrophosphate amidotransferase                                           | -2.4 |
| <b>MS4A1</b>                                   | membrane-spanning 4-domains, subfamily A, member 1                                      | -2.3 |
| <b>LHFPL2</b>                                  | lipoma HMGIC fusion partner-like 2                                                      | -2.3 |
| <b>HLA-DPB1</b>                                | major histocompatibility complex, class II, DP beta 1                                   | -2.3 |
| <b>PSTPIP1</b>                                 | proline-serine-threonine phosphatase interacting protein 1                              | -2.3 |
| <b>GATM</b>                                    | glycine amidinotransferase (L-arginine:glycine amidinotransferase)                      | -2.2 |
| <b>RAPGEF5</b>                                 | Rap guanine nucleotide exchange factor (GEF) 5                                          | -2.2 |
| <b>MBP</b>                                     | myelin basic protein                                                                    | -2.2 |
| <b>ADD3</b>                                    | adducin 3 (gamma)                                                                       | -2.2 |
| <b>LOC100996752 /// LOC101060261 /// NUDT4</b> | uncharacterized LOC100996752 /// uncharacterized LOC101060261 /// nudix (nucleoside dip | -2.2 |
| <b>SMG9</b>                                    | smg-9 homolog, nonsense mediated mRNA decay factor (C. elegans)                         | -2.2 |

|                 |                                                                                         |      |
|-----------------|-----------------------------------------------------------------------------------------|------|
| <b>KCNN3</b>    | potassium intermediate/small conductance calcium-activated channel, subfamily N, member | -2.2 |
| <b>COTL1</b>    | coactosin-like 1 (Dictyostelium)                                                        | -2.1 |
| <b>NAPSB</b>    | napsin B aspartic peptidase, pseudogene                                                 | -2.1 |
| <b>MGC70870</b> | C-terminal binding protein 2 pseudogene                                                 | -2.1 |
| <b>ANXA11</b>   | annexin A11                                                                             | -2.0 |
| <b>KYNU</b>     | kynureninase                                                                            | -2.0 |
| <b>KIAA0930</b> | KIAA0930                                                                                | -2.0 |
| <b>MAST3</b>    | microtubule associated serine/threonine kinase 3                                        | -2.0 |
| <b>BTN3A3</b>   | butyrophilin, subfamily 3, member A3                                                    | -2.0 |
| <b>NEK6</b>     | NIMA-related kinase 6                                                                   | -2.0 |

<sup>a</sup>FC was calculated between the mean values of control and patient

Table S2: List of PTC-containing genes

| Gene Symbol | Gene Title      | Affymetrix Type | zygosity | refGene function | refGene exonic function              | Patient1a | Patient1b | Average Expr |
|-------------|-----------------|-----------------|----------|------------------|--------------------------------------|-----------|-----------|--------------|
| PLEKHA2     | pleckstrin homo | 225136_at       | NMD      | hom              | exonic;splicing frameshift deletion  | 8.469     | 8.474     | 8.471        |
| SON         | SON DNA binding | 214988_s_       | NMD      | hom              | exonic frameshift deletion           | 8.398     | 8.472     | 8.435        |
| SLAIN1      | SLAIN motif fam | 225619_at       | NMD      | hom              | exonic frameshift insertion          | 8.323     | 8.438     | 8.381        |
| EFTUD2      | elongation fact | 222398_s_       | NMD      | het              | exonic;splicing frameshift insertion | 8.124     | 8.153     | 8.139        |
| NOP16       | NOP16 nucleolar | 214011_s_       | NMD      | hom              | exonic frameshift insertion          | 8.101     | 8.042     | 8.072        |
| UBE2NL      | ubiquitin-conju | 217393_x_       | NMD      | hom              | exonic stopgain                      | 8.064     | 8.001     | 8.033        |
| CLECL1      | C-type lectin-I | 244413_at       | NMD      | het              | exonic frameshift insertion          | 8.097     | 7.933     | 8.015        |
| RRM2B       | ribonucleotide  | 223342_at       | NMD      | het              | exonic frameshift insertion          | 7.207     | 7.655     | 7.431        |
| DCAF7       | DDB1 and CUL4 a | 224748_at       | NMD      | hom              | exonic;splicing frameshift deletion  | 7.215     | 7.280     | 7.248        |
| P2RX5       | purinergic rece | 210448_s_       | NMD      | het              | exonic frameshift deletion           | 7.160     | 7.222     | 7.191        |
| MRPS34      | mitochondrial r | 218112_at       | NMD      | het              | exonic;splicing frameshift insertion | 6.814     | 6.773     | 6.794        |
| KMT2C       | lysine (K)-spec | 222415_at       | NMD      | het              | exonic stopgain                      | 6.629     | 6.858     | 6.743        |
| SENTP3      | SUMO1/sentrin/S | 203871_at       | NMD      | hom              | exonic;splicing frameshift deletion  | 6.213     | 6.271     | 6.242        |
| CPNE1       | copine I        | 206918_s_       | NMD      | het              | exonic frameshift insertion          | 6.029     | 6.075     | 6.052        |
| HEY1        | hes-related fam | 44783_s_a       | NMD      | hom              | exonic frameshift deletion           | 5.795     | 5.861     | 5.828        |
| CASP7       | caspase 7, apop | 207181_s_       | NMD      | het              | exonic frameshift deletion           | 5.804     | 5.677     | 5.740        |
| IQSEC1      | IQ motif and Se | 203907_s_       | NMD      | hom              | exonic;splicing frameshift deletion  | 5.478     | 5.660     | 5.569        |
| SLC37A4     | solute carrier  | 202830_s_       | NMD      | hom              | exonic;splicing frameshift deletion  | 5.628     | 5.499     | 5.564        |
| ZNF598      | zinc finger pro | 225104_at       | NMD      | hom              | exonic;splicing frameshift deletion  | 5.650     | 5.384     | 5.517        |
| EML3        | echinoderm micr | 203442_x_       | NMD      | hom              | exonic stopgain                      | 5.260     | 5.260     | 5.260        |
| IL17RB      | interleukin 17  | 224156_x_       | NMD      | hom              | exonic stopgain                      | 5.445     | 4.932     | 5.188        |
| VPS13B      | vacuolar protei | 213243_at       | NMD      | het              | exonic stopgain                      | 4.846     | 5.297     | 5.072        |
| KMT2B       | lysine (K)-spec | 203419_at       | NMD      | hom              | exonic;splicing frameshift insertion | 5.040     | 4.792     | 4.916        |
| NEIL2       | nei endonucleas | 226585_at       | NMD      | het              | exonic;splicing frameshift deletion  | 4.866     | 4.853     | 4.860        |
| PVRIG       | poliovirus rece | 219812_at       | NMD      | hom              | exonic stopgain                      | 4.948     | 4.743     | 4.846        |
| SLC41A3     | solute carrier  | 224931_at       | NMD      | het              | exonic frameshift deletion           | 4.655     | 4.918     | 4.787        |
| ZFPM1       | zinc finger pro | 242282_at       | NMD      | hom              | exonic frameshift deletion           | 4.764     | 4.764     | 4.764        |
| NOP9        | NOP9 nucleolar  | 225514_at       | NMD      | het              | exonic stopgain                      | 4.614     | 4.724     | 4.669        |
| ZBTB7B      | zinc finger and | 235145_at       | NMD      | het              | exonic stopgain                      | 4.670     | 4.598     | 4.634        |
| BTN3A3      | butyrophilin, s | 204821_at       | NMD      | het              | exonic stopgain                      | 4.559     | 4.663     | 4.611        |
| ZNF211      | zinc finger pro | 205437_at       | NMD      | het              | exonic frameshift deletion           | 4.464     | 4.623     | 4.544        |
| ZFYVE19     | zinc finger, FY | 225843_at       | NMD      | het              | exonic frameshift insertion          | 4.574     | 4.505     | 4.539        |
| PRDM15      | PR domain conta | 230777_s_       | NMD      | hom              | exonic;splicing frameshift insertion | 4.493     | 4.349     | 4.421        |
| MOB3C       | MOB kinase acti | 227066_at       | NMD      | hom              | exonic stopgain                      | 4.306     | 4.306     | 4.306        |
| CRIPAK      | cysteine-rich P | 228318_s_       | NMD      | het              | exonic frameshift deletion           | 3.838     | 4.035     | 3.936        |
| SARM1       | sterile alpha a | 213259_s_       | NMD      | hom              | exonic frameshift insertion          | 3.757     | 3.337     | 3.547        |
| TMEM80      | transmembrane p | 65630_at        | NMD      | het              | exonic frameshift deletion           | 3.515     | 3.515     | 3.515        |

|           |                 |               |     |                 |                      |       |       |       |
|-----------|-----------------|---------------|-----|-----------------|----------------------|-------|-------|-------|
| EBLN2     | endogenous Born | 219906_at NMD | het | exonic          | frameshift insertion | 3.266 | 3.266 | 3.266 |
| MAPK12    | mitogen-activat | 206106_at NMD | het | exonic          | frameshift insertion | 3.482 | 2.928 | 3.205 |
| SSTR3     | somatostatin re | 1553178_a NMD | hom | exonic          | frameshift insertion | 3.211 | 3.097 | 3.154 |
| LCN10     | lipocalin 10    | 238071_at NMD | het | exonic;splicing | stopgain             | 2.920 | 3.388 | 3.154 |
| ZNF516    | zinc finger pro | 203604_at NMD | hom | exonic;splicing | frameshift deletion  | 2.919 | 3.321 | 3.120 |
| ZNF117    | zinc finger pro | 235408_x_ NMD | het | exonic          | stopgain             | 3.070 | 3.070 | 3.070 |
| NLRC3     | NLR family, CAR | 236295_s_ NMD | hom | exonic;splicing | frameshift deletion  | 2.684 | 3.316 | 3.000 |
| ZNF480    | zinc finger pro | 222283_at NMD | hom | exonic          | frameshift deletion  | 3.091 | 2.876 | 2.983 |
| PDE4DIP   | phosphodiestera | 205872_x_ NMD | het | exonic          | stopgain             | 2.916 | 3.002 | 2.959 |
| C17orf100 | chromosome 17 o | 229071_at NMD | hom | exonic          | frameshift insertion | 2.648 | 2.981 | 2.814 |
| NCAM1     | neural cell adh | 209968_s_ NMD | hom | exonic;splicing | frameshift deletion  | 2.795 | 2.795 | 2.795 |
| TUT1      | terminal uridyl | 218965_s_ NMD | het | exonic          | frameshift deletion  | 2.814 | 2.655 | 2.735 |
| SLC46A1   | solute carrier  | 1552279_a NMD | hom | exonic;splicing | frameshift deletion  | 2.634 | 2.746 | 2.690 |
| KHDC1     | KH homology dom | 230055_at NMD | het | exonic          | stopgain             | 2.543 | 2.814 | 2.679 |
| FUT2      | fucosyltransfer | 208505_s_ NMD | het | exonic          | stopgain             | 2.683 | 2.526 | 2.604 |
| NEK3      | NIMA-related ki | 213116_at NMD | hom | exonic;splicing | frameshift insertion | 2.432 | 2.543 | 2.488 |
| GAB4      | GRB2-associated | 1563816_a NMD | het | exonic;splicing | stopgain             | 2.424 | 2.504 | 2.464 |
| KCNMB3    | potassium large | 221125_s_ NMD | het | exonic          | frameshift deletion  | 2.336 | 2.411 | 2.373 |
| RHPN2     | rhopilin, Rho   | 227196_at NMD | het | exonic          | stopgain             | 2.283 | 2.384 | 2.334 |
| DNAH11    | dynein, axonema | 1553159_a NMD | het | exonic          | stopgain             | 2.317 | 2.317 | 2.317 |
| EFCAB13   | EF-hand calcium | 231651_at NMD | het | exonic          | stopgain             | 2.206 | 2.363 | 2.284 |
| VSIG10L   | V-set and immun | 238654_at NMD | hom | exonic;splicing | frameshift insertion | 2.055 | 2.486 | 2.270 |
| SRRM3     | serine/arginine | 235880_at NMD | hom | exonic;splicing | frameshift insertion | 2.313 | 2.206 | 2.260 |
| PKD1L2    | polycystic kidn | 1559261_a NMD | hom | exonic          | frameshift deletion  | 2.144 | 2.313 | 2.228 |
| CC2D2A    | coiled-coil and | 234936_s_ NMD | het | exonic          | stopgain             | 2.126 | 2.326 | 2.226 |
| GGT6      | gamma-glutamylt | 236225_at NMD | hom | exonic;splicing | stopgain             | 2.083 | 2.299 | 2.191 |
| APOC3     | apolipoprotein  | 205820_s_ NMD | het | exonic;splicing | stopgain             | 2.205 | 2.130 | 2.168 |
| ZNF519    | zinc finger pro | 1564190_x NMD | het | exonic          | stopgain             | 2.219 | 2.111 | 2.165 |
| LFNG      | LFNG O-fucosylp | 228762_at NMD | het | exonic          | stopgain             | 2.303 | 2.027 | 2.165 |
| TPSD1     | tryptase delta  | 214568_at NMD | het | exonic          | frameshift deletion  | 2.141 | 2.141 | 2.141 |
| DDIT4L    | DNA-damage-indu | 228057_at NMD | het | exonic          | frameshift deletion  | 2.006 | 2.264 | 2.135 |
| SSPO      | SCO-spondin     | 234349_at NMD | hom | exonic;splicing | frameshift insertion | 2.079 | 2.150 | 2.115 |
| ATRNL1    | attractin-like  | 1569796_s NMD | hom | exonic          | frameshift insertion | 1.921 | 2.248 | 2.085 |
| ZNF283    | zinc finger pro | 243188_at NMD | het | exonic          | frameshift deletion  | 2.079 | 2.079 | 2.079 |
| OPRM1     | opioid receptor | 211359_s_ NMD | het | exonic          | stopgain             | 2.017 | 2.125 | 2.071 |
| GRIA3     | glutamate recep | 1569290_s NMD | hom | exonic          | frameshift insertion | 2.012 | 2.113 | 2.063 |
| C14orf105 | chromosome 14 o | 1569434_a NMD | het | exonic          | stopgain             | 2.177 | 1.893 | 2.035 |
| KRTAP7-1  | keratin associa | 1564960_a NMD | hom | exonic;splicing | frameshift deletion  | 1.913 | 2.122 | 2.018 |
| SCARF2    | scavenger recep | 227557_at NMD | hom | exonic;splicing | frameshift insertion | 2.201 | 1.826 | 2.014 |

|          |                  |               |     |                 |                      |       |       |       |
|----------|------------------|---------------|-----|-----------------|----------------------|-------|-------|-------|
| P2RY4    | pyrimidinergic   | 221466_at NMD | het | exonic          | stopgain             | 1.862 | 2.165 | 2.014 |
| NR2E3    | nuclear recepto  | 208385_at NMD | hom | exonic;splicing | frameshift deletion  | 2.116 | 1.911 | 2.014 |
| P4HA3    | prolyl 4-hydrox  | 228703_at NMD | het | exonic          | stopgain             | 2.138 | 1.886 | 2.012 |
| ACTN2    | actinin, alpha   | 203864_s_ NMD | het | exonic          | frameshift deletion  | 2.095 | 1.916 | 2.006 |
| ADRA2C   | adrenoceptor al  | 206128_at NMD | het | exonic          | frameshift insertion | 2.117 | 1.849 | 1.983 |
| DHDH     | dihydrodiol deh  | 231416_at NMD | het | exonic          | frameshift insertion | 2.123 | 1.838 | 1.981 |
| RETNLB   | resistin like b  | 223969_s_ NMD | het | exonic          | frameshift insertion | 1.889 | 1.951 | 1.920 |
| ROBO3    | roundabout, axo  | 219550_at NMD | het | exonic          | frameshift insertion | 1.858 | 1.972 | 1.915 |
| DCHS2    | dachsous cadher  | 220373_at NMD | het | exonic          | frameshift deletion  | 1.884 | 1.884 | 1.884 |
| FAM187B  | family with seq  | 242259_at NMD | hom | exonic          | stopgain             | 1.908 | 1.825 | 1.866 |
| KRT24    | keratin 24       | 220267_at NMD | het | exonic          | frameshift deletion  | 1.892 | 1.820 | 1.856 |
| TCEB3B   | transcription e  | 220844_at NMD | het | exonic          | stopgain             | 1.788 | 1.876 | 1.832 |
| SLC38A3  | solute carrier   | 205972_at NMD | hom | exonic;splicing | frameshift insertion | 1.995 | 1.654 | 1.825 |
| SPATA8   | spermatogenesis  | 231006_at NMD | het | exonic;splicing | stopgain             | 1.879 | 1.770 | 1.825 |
| KRT37    | keratin 37       | 207649_at NMD | het | exonic          | stopgain             | 1.935 | 1.702 | 1.819 |
| ALLC     | allantoicase     | 220365_at NMD | het | exonic          | stopgain             | 1.747 | 1.817 | 1.782 |
| MS4A14   | membrane-spanni  | 229510_at NMD | hom | exonic          | frameshift deletion  | 1.875 | 1.676 | 1.776 |
| ZNF233   | zinc finger pro  | 230919_at NMD | het | exonic          | frameshift deletion  | 1.844 | 1.707 | 1.776 |
| TGM4     | transglutaminas  | 206260_at NMD | het | exonic          | stopgain             | 1.896 | 1.592 | 1.744 |
| CASP12   | caspase 12 (gen  | 1564736_a NMD | hom | exonic          | stopgain             | 1.691 | 1.774 | 1.733 |
| TRPM4    | transient recep  | 219360_s_ NMD | het | exonic          | stopgain             | 1.809 | 1.657 | 1.733 |
| SLC22A24 | solute carrier   | 1553923_a NMD | het | exonic          | stopgain             | 1.613 | 1.852 | 1.733 |
| C11orf40 | chromosome 11 o  | 1553086_a NMD | het | exonic          | frameshift insertion | 1.689 | 1.764 | 1.727 |
| PRM3     | protamine 3      | 231758_at NMD | hom | exonic          | stopgain             | 1.633 | 1.731 | 1.682 |
| USP29    | ubiquitin speci  | 220895_at NMD | hom | exonic          | stopgain             | 1.587 | 1.691 | 1.639 |
| PTTG2    | pituitary tumor  | 214557_at NMD | het | exonic          | frameshift deletion  | 1.638 | 1.638 | 1.638 |
| IDO2     | indoleamine 2,3  | 1568638_a NMD | hom | exonic          | stopgain             | 1.753 | 1.495 | 1.624 |
| ZNF852   | zinc finger pro  | 1564662_a NMD | hom | exonic;splicing | frameshift deletion  | 1.556 | 1.639 | 1.598 |
| MS4A12   | membrane-spanni  | 220834_at NMD | hom | exonic          | stopgain             | 1.598 | 1.598 | 1.598 |
| CHST15   | carbohydrate (N  | 203066_at NMD | hom | exonic;splicing | frameshift deletion  | 1.553 | 1.636 | 1.595 |
| COL6A5   | collagen, type   | 1553835_a NMD | het | exonic          | stopgain             | 1.614 | 1.500 | 1.557 |
| H2BFM    | H2B histone fam  | 234899_at NMD | het | exonic          | stopgain             | 1.553 | 1.553 | 1.553 |
| A2ML1    | alpha-2-macrogli | 1553505_a NMD | het | exonic          | frameshift deletion  | 1.555 | 1.483 | 1.519 |
| CD207    | CD207 molecule,  | 220428_at NMD | hom | exonic;splicing | frameshift insertion | 1.607 | 1.419 | 1.513 |
| SLC7A13  | solute carrier   | 238287_at NMD | hom | exonic          | frameshift deletion  | 1.537 | 1.445 | 1.491 |
| GRP      | gastrin-releasi  | 206326_at NMD | het | exonic;splicing | frameshift deletion  | 1.527 | 1.455 | 1.491 |
| CPN2     | carboxypeptidas  | 216223_at NMD | het | exonic          | stopgain             | 1.311 | 1.388 | 1.350 |
| VWDE     | von Willebrand   | 239552_at NMD | het | exonic          | stopgain             | 1.382 | 1.250 | 1.316 |
| MAL2     | mal, T-cell dif  | 224650_at NMD | hom | exonic;splicing | frameshift deletion  | 1.269 | 1.355 | 1.312 |

ZNF80

zinc finger pro

207272\_at NMD

hom

exonic

stopgain

1.350

1.066

1.208



Supplemental Table 3: List of RTPCR primers used in this study

| Gene name     | Forward                 | Reverse                    |
|---------------|-------------------------|----------------------------|
| <i>SMG9</i>   | GAATTGGTGTGACAGTGCCA    | GCAGTTTGCGGTCATTATTGA      |
| <i>VIM</i>    | TCA AGGGCCAAGGCA A      | ATCTGAGCCTGCAGCTCC         |
| <i>TNS3</i>   | ACCAGGCCCTTG ACAGG      | ATG ACA TCTCCC TTC AGA AGC |
| <i>EGR1</i>   | ACCTTCAACCCTCAGGCG      | CTA GGCCACTGA CCA AGCTG    |
| <i>UCHL1</i>  | CAG TGGCCA ATAATCAAGACA | CTT CAGCAGGGTGTC CTCT      |
| <i>SPINT2</i> | CCATGC CTA GGTGGTGGT    | GGAGTGGTCTTCAGA ATCCTG     |
| <i>RORA</i>   | GTAGAAACCGCTGCCAAC A    | TGGTCTGGGGAAGGCTG          |
| <i>VCAN</i>   | GCC TTCAA GTTATGTTG GTG | GCC AAATGATTA CAACACAGTCTT |
